# Supplementary material
Source: MDPI journal article supplement (https://www.mdpi.com/2079-8954/9/3/60)
Supplement: s1 [file s1]

# Supplementary Material

This material documents the variables, run specifications, arrays, optimisation results, initial properties and equations used in the SEIR model described in the article “COVID-19 case rates in the UK: modelling uncertainties as lockdown lifts”. The full model, written in ‘Stella Architect’ software, is available on request from the authors.

## 1. Variables

Table S1: Summary of variables used in SEIR Model of COVID-19 pandemic in the UK

| Total           | Count | Including Array Elements |
|-----------------|-------|--------------------------|
| Variables       | 73    | 102                      |
| Stocks          | 11    | 15                       |
| Flows           | 12    | 18                       |
| Converters      | 50    | 69                       |
| Constants       | 25    | 33                       |
| Equations       | 37    | 54                       |
| Graphicals      | 2     | 2                        |
| Macro Variables | 10    |                          |

## 2. Run Specifications

Table S2: Run specifications for SEIR Model of COVID-19 pandemic in the UK

| Run Specs          |       |
|--------------------|-------|
| Start Time         | 0     |
| Stop Time          | 700   |
| DT                 | 1/4   |
| Fractional DT      | True  |
| Save Interval      | 0.25  |
| Sim Duration       | 1.5   |
| Time Units         | Days  |
| Pause Interval     | 0     |
| Integration Method | Euler |

## 3. Arrays

Table S3: Arrays used in SEIR Model of COVID-19 pandemic in the UK

| Array Dimension | Indexed by | Elements       |
|-----------------|------------|----------------|
| awareness       | Label (2)  | Unknown, Known |
| dose            | Label (2)  | One, Two       |
| vaccine         | Label (2)  | PB, AZ         |

#### 4. Optimisation

The Powell method was used to minimise squared error for the variable ‘smoothed known new cases’ against actual reported smoothed known new cases from 1<sup>st</sup> Feb 2020 to 12<sup>th</sup> July 2021. All parameters were of the same order of magnitude so no scaling adjustments were necessary.

The first optimisation was performed with results up to Feb 2021 to estimate values of contact rates, which are different for known and unknown cases, the known proportion of cases in Feb 2021 and the ratio of infectiousness of known infections to unknown infections.

**Table S4: Optimisation parameters for known proportion calculation**

| Parameter / Value range | unconstrained infecting contact rate[unknown] | unconstrained infecting contact rate[known] | unknown infectiousness ratio | final known proportion (Feb 2021) |
|-------------------------|-----------------------------------------------|---------------------------------------------|------------------------------|-----------------------------------|
| min_value               | 0.4 contacts per day                          | 0 contacts per day                          | 0                            | 0                                 |
| max_value               | 0.7 contacts per day                          | 0.3 contacts per day                        | 1                            | 1                                 |
| scaling                 | 1                                             | 1                                           | 1                            | 1                                 |

**Table S5: Optimisation results for known proportion calculation**

| Parameter / 95% CI bounds | unconstrained infecting contact rate[unknown] | unconstrained infecting contact rate[known] | unknown infectiousness ratio | final known proportion (Feb 2021) |
|---------------------------|-----------------------------------------------|---------------------------------------------|------------------------------|-----------------------------------|
| Lower                     | 0.5220                                        | 0.0983                                      | 0.7657                       | 0.2112                            |
| Value                     | 0.5228                                        | 0.0995                                      | 0.7666                       | 0.2126                            |
| Upper                     | 0.5235                                        | 0.1005                                      | 0.7675                       | 0.2132                            |

The known proportion from Optimisation 1 was assumed to have increased from 21% in Feb 2021 to 50% in July 2021 as a result of increased testing and this was reflected in the model through a graphical function which changed over time.

A second set of optimisation runs were performed in July 2021 in order to include the additional case history accumulated between Feb 2021 and July 2021. This optimisation calculated contact rates, which are different for known and unknown cases, the ratio of infectiousness of known infections to unknown infections and the relative infectiousness of the Alpha and Delta variants. Optimisations using the same ranges for the five parameters were run for the three different immunity scenarios of 8 months, 5 months and 12 months for both recovered and vaccinated immunity.

**Table S6: Optimisation parameters for final model values calculation**

| Parameter / Value range | unconstrained infecting contact rate[unknown] | unconstrained infecting contact rate[known] | unknown infectiousness ratio | Alpha strain relative infectivity | Delta strain relative infectivity |
|-------------------------|-----------------------------------------------|---------------------------------------------|------------------------------|-----------------------------------|-----------------------------------|
| Lower                   | 0.4 contacts per day                          | 0.02 contacts per day                       | 0.5                          | 1.3                               | 1.5                               |
| Value                   | 0.7 contacts per day                          | 0.3 contacts per day                        | 0.9                          | 1.7                               | 2.5                               |
| Upper                   | 1                                             | 1                                           | 1                            | 1                                 | 1                                 |

Table S7: Optimisation results for 8-month immunity parameter values calculation

| Parameter / 95% CI bounds | unconstrained infecting contact rate[unknown] | unconstrained infecting contact rate[known] | unknown infectiousness ratio | Alpha strain relative infectivity | Delta strain relative infectivity |
|---------------------------|-----------------------------------------------|---------------------------------------------|------------------------------|-----------------------------------|-----------------------------------|
| Lower                     | 0.5611                                        | 0.1407                                      | 0.7221                       | 1.3162                            | 1.9960                            |
| Value                     | 0.5616                                        | 0.1418                                      | 0.7229                       | 1.3238                            | 2.0023                            |
| Upper                     | 0.5623                                        | 0.1426                                      | 0.7237                       | 1.3311                            | 2.0096                            |

Table S8: Optimisation results for 5-month immunity parameter values calculation

| Parameter / 95% CI bounds | unconstrained infecting contact rate[unknown] | unconstrained infecting contact rate[known] | unknown infectiousness ratio | Alpha strain relative infectivity | Delta strain relative infectivity |
|---------------------------|-----------------------------------------------|---------------------------------------------|------------------------------|-----------------------------------|-----------------------------------|
| Lower                     | 0.5541                                        | 0.1072                                      | 0.7657                       | 1.3284                            | 1.9208                            |
| Value                     | 0.5544                                        | 0.1079                                      | 0.7663                       | 1.3318                            | 1.9332                            |
| Upper                     | 0.5550                                        | 0.1086                                      | 0.7670                       | 1.3370                            | 1.9367                            |

Table S9: Optimisation results for 12-month immunity parameter values calculation

| Parameter / 95% CI bounds | unconstrained infecting contact rate[unknown] | unconstrained infecting contact rate[known] | unknown infectiousness ratio | Alpha strain relative infectivity | Delta strain relative infectivity |
|---------------------------|-----------------------------------------------|---------------------------------------------|------------------------------|-----------------------------------|-----------------------------------|
| Lower                     | 0.5250                                        | 0.1663                                      | 0.7468                       | 1.3017                            | 2.0480                            |
| Value                     | 0.5253                                        | 0.1671                                      | 0.7474                       | 1.3030                            | 2.0569                            |
| Upper                     | 0.5259                                        | 0.1677                                      | 0.7481                       | 1.3170                            | 2.0644                            |

## 5. Equations and variable values used in model

Table S10: Variables with initial values in base case of SEIR Model of COVID-19 pandemic

| Variable                                        | Equation                                                                                                                                                   | Properties                                            | Units      | Annotation   |
|-------------------------------------------------|------------------------------------------------------------------------------------------------------------------------------------------------------------|-------------------------------------------------------|------------|--------------|
| cumulative_deaths(t)                            | $\text{cumulative\_deaths}(t - dt) + (\text{deaths}) * dt$                                                                                                 | INIT cumulative_deaths = 0                            | Person     | NON-NEGATIVE |
| incubating(t)                                   | $\text{incubating}(t - dt) + (\text{new\_infecting} + \text{recovered\_infecting} - \text{becoming\_infectious}) * dt$                                     | INIT incubating = 30                                  | Person     | NON-NEGATIVE |
| known_infected_stage_2(t)                       | $\text{known\_infected\_stage\_2}(t - dt) + (\text{becoming\_known} - \text{recovering} - \text{deaths}) * dt$                                             | INIT known_infected_stage_2 = 2                       | Person     | NON-NEGATIVE |
| new_susceptible_unadjusted(t)                   | $\text{new\_susceptible\_unadjusted}(t - dt) + (-\text{new\_infecting}) * dt$                                                                              | INIT new_susceptible_unadjusted = 67886004            | Person     | NON-NEGATIVE |
| recovered_known_immune(t)                       | $\text{recovered\_known\_immune}(t - dt) + (\text{recovering} - \text{known\_becoming\_susceptible}) * dt$                                                 | INIT recovered_known_immune = 0                       | Person     | NON-NEGATIVE |
| recovered_susceptible(t)                        | $\text{recovered\_susceptible}(t - dt) + (\text{known\_becoming\_susceptible} + \text{unknown\_becoming\_susceptible} - \text{recovered\_infecting}) * dt$ | INIT recovered_susceptible = 0                        | Person     | NON-NEGATIVE |
| recovered_unknown_immune(t)                     | $\text{recovered\_unknown\_immune}(t - dt) + (\text{becoming\_uninfectious} - \text{unknown\_becoming\_susceptible}) * dt$                                 | INIT recovered_unknown_immune = 0                     | Person     | NON-NEGATIVE |
| unknown_infected_stage_1(t)                     | $\text{unknown\_infected\_stage\_1}(t - dt) + (\text{becoming\_infectious} - \text{becoming\_known} - \text{unknown\_evolving\_into\_stage\_2}) * dt$      | INIT unknown_infected_stage_1 = 60                    | Person     | NON-NEGATIVE |
| unknown_infected_stage_2(t)                     | $\text{unknown\_infected\_stage\_2}(t - dt) + (\text{unknown\_evolving\_into\_stage\_2} - \text{becoming\_uninfectious}) * dt$                             | INIT unknown_infected_stage_2 = 120                   | Person     | NON-NEGATIVE |
| vaccinations_by_type_and_dose[vaccine, dose](t) | $\text{vaccinations\_by\_type\_and\_dose}[vaccine, dose](t - dt) + (\text{vaccinating}[vaccine, dose] - \text{protection\_loss}[vaccine, dose]) * dt$      | INIT vaccinations_by_type_and_dose[vaccine, dose] = 0 | Dose       | NON-NEGATIVE |
| vaccine_stock[PB](t)                            | $\text{vaccine\_stock}[PB](t - dt) + (-\text{vaccinating}[PB, One] - \text{vaccinating}[PB, Two]) * dt$                                                    | INIT vaccine_stock[PB] = 50000000                     | Dose       | NON-NEGATIVE |
| vaccine_stock[AZ](t)                            | $\text{vaccine\_stock}[AZ](t - dt) + (-\text{vaccinating}[AZ, One] - \text{vaccinating}[AZ, Two]) * dt$                                                    | INIT vaccine_stock[AZ] = 150000000                    |            |              |
| becoming_infectious                             | incubating/incubation_duration                                                                                                                             |                                                       | Person/Day | UNIFLOW      |

|                                |                                                                                                                                                                                                       |                     |            |         |
|--------------------------------|-------------------------------------------------------------------------------------------------------------------------------------------------------------------------------------------------------|---------------------|------------|---------|
| becoming_known                 | unknown_infected_stage_1*known_proportion/disease_duration_stage_1                                                                                                                                    | OUTFLOW PRIORITY: 1 | Person/Day | UNIFLOW |
| becoming_uninfected            | unknown_infected_stage_2/unknown_disease_duration_stage_2                                                                                                                                             |                     | Person/Day | UNIFLOW |
| deaths                         | MIN(case_fatality_rate, 1)*known_infected_stage_2/time_from_known_till_death                                                                                                                          | OUTFLOW PRIORITY: 2 | Person/Day | UNIFLOW |
| known_becoming_susceptible     | recovered_known_immune*(1-average_immunity_protection)/average_immunity_duration                                                                                                                      |                     | Person/Day | UNIFLOW |
| new_infecting                  | fraction_new_susceptible*(((unknown_infected_stage_1+unknown_infected_stage_2)*controlled_infecting_contact_rate[unknown])+((known_infected_stage_2*controlled_infecting_contact_rate[known])))       |                     | Person/Day | UNIFLOW |
| protection_loss[vaccine, dose] | vaccinations_by_type_and_dose/average_immunity_duration                                                                                                                                               |                     | Dose/Days  | UNIFLOW |
| recovered_infecting            | fraction_recovered_susceptible*(((unknown_infected_stage_1+unknown_infected_stage_2)*controlled_infecting_contact_rate[unknown])+((known_infected_stage_2*controlled_infecting_contact_rate[known]))) |                     | Person/Day | UNIFLOW |
| recovering                     | (1-MIN(case_fatality_rate, 1))*known_infected_stage_2/known_disease_duration_stage_2                                                                                                                  | OUTFLOW PRIORITY: 1 | Person/Day | UNIFLOW |
| unknown_becoming_susceptible   | recovered_unknown_immune*(1-average_immunity_protection)/average_immunity_duration                                                                                                                    |                     | Person/Day | UNIFLOW |
| unknown_evolving_into_stage_2  | unknown_infected_stage_1*(1-known_proportion)/disease_duration_stage_1                                                                                                                                | OUTFLOW PRIORITY: 2 | Person/Day | UNIFLOW |
| vaccinating[PB, One]           | IF TIME>vaccination_start_date[PB, Two] THEN<br>vaccination_daily_rate[PB]/2<br>ELSE IF TIME > vaccination_start_date[PB, One] THEN vaccination_daily_rate[PB]<br>ELSE 0                              |                     | Dose/Days  | UNIFLOW |
| vaccinating[PB, Two]           | IF TIME>vaccination_start_date[PB, Two] THEN<br>vaccination_daily_rate[PB]/2<br>ELSE 0                                                                                                                |                     |            |         |

|                                                    |                                                                                                                                                                                                                                                                                 |            |                      |
|----------------------------------------------------|---------------------------------------------------------------------------------------------------------------------------------------------------------------------------------------------------------------------------------------------------------------------------------|------------|----------------------|
|                                                    | IF<br>TIME>vaccination_start_date[AZ,<br>Two] THEN<br>vaccination_daily_rate[AZ]/2<br>ELSE IF TIME ><br>vaccination_start_date[AZ,One]<br>THEN<br>vaccination_daily_rate[AZ] ELSE<br>0                                                                                          |            |                      |
| vaccinating[AZ,<br>One]                            | IF<br>TIME>vaccination_start_date[AZ,<br>Two] THEN<br>vaccination_daily_rate[AZ]/2<br>ELSE 0<br>IF TIME > delta_strain_start_date<br>THEN<br>delta_strain_relative_infectivity<br>ELSE IF TIME ><br>alpha_strain_start_date THEN<br>alpha_strain_relative_infectivity<br>ELSE 1 | Dmnl       |                      |
| adjusted_infecti<br>vity                           |                                                                                                                                                                                                                                                                                 |            |                      |
| alpha_strain_rel<br>ative_infectivity              | 1.32379831198934                                                                                                                                                                                                                                                                | Days       |                      |
| alpha_strain_sta<br>rt_date                        | 310                                                                                                                                                                                                                                                                             | Dmnl       |                      |
| average_immuni<br>ty_duration                      | 243                                                                                                                                                                                                                                                                             | Dmnl       |                      |
| average_immuni<br>ty_protection                    | 0.7                                                                                                                                                                                                                                                                             | Person/Day |                      |
| case_fatality_rat<br>e                             | 0                                                                                                                                                                                                                                                                               | 1/Day      |                      |
| cases_to_invoke<br>_intervention                   | 5000                                                                                                                                                                                                                                                                            |            |                      |
| controlled_infect<br>ing_contact_rate<br>[unknown] | unknown_infectiousness_ratio<br>*adjusted_infectivity<br>*unconstrained_infecting_contact<br>_rate[unknown]*((100-<br>lockdown%_modified)/100)                                                                                                                                  | Person     |                      |
| controlled_infect<br>ing_contact_rate<br>[known]   | unconstrained_infecting_contact_<br>rate[known]*adjusted_infectivity*<br>((100-<br>(lockdown%_modified/5))/100)                                                                                                                                                                 | Day        |                      |
| cumulative_case<br>s                               | cumulative_deaths +<br>known_infected_stage_2 +<br>recovered_known_immune +<br>recovered_susceptible                                                                                                                                                                            | Dmnl       | SUMMING<br>CONVERTER |
| delta_strain_rela<br>tive_infectivity              | 2                                                                                                                                                                                                                                                                               | Dmnl       |                      |
| delta_strain_star<br>t_date                        | 438                                                                                                                                                                                                                                                                             | Dmnl       |                      |

|                                                                      |                                                                                                                               |             |
|----------------------------------------------------------------------|-------------------------------------------------------------------------------------------------------------------------------|-------------|
| disease_duration_stage_1                                             | 2                                                                                                                             | Dmnl        |
| effect_on_unknown_proportion_by_vaccine_type_and_dose[vaccine, dose] | vaccinations_by_type_and_dose[known_to_unknown_shift_by_type_and_dose[vaccine, dose]/total_pop                                | Dmnl        |
| fraction_new_susceptible                                             | ((new_susceptible_unadjusted)*(1-vaccine_immune_fraction))/total_pop                                                          | Dmnl        |
| fraction_recovered_susceptible                                       | (recovered_susceptible*(1-vaccine_immune_fraction))/total_pop                                                                 | Days        |
| highest_known_proportion                                             | 0.5                                                                                                                           | Person      |
| highlights_mode_l_sensitivities                                      | NAN                                                                                                                           | Dmnl        |
| highlights_value_s_varied_in_scenarios                               | NAN                                                                                                                           | Dmnl        |
| incubation_duration                                                  | 3.5                                                                                                                           | Day         |
| indicated_immune_population_by_dose[vaccine, dose]                   | vaccinations_by_type_and_dose*vaccine_transmission_protection_by_dose                                                         | Person/Day  |
| Intervention_switch                                                  | 0                                                                                                                             | Dmnl        |
| invervention_%                                                       | 25                                                                                                                            | Person/Dose |
| known_disease_duration_stage_2                                       | 8                                                                                                                             |             |
| known_new_cases                                                      | DELAY(becoming_known, 4)                                                                                                      |             |
| known_proportion                                                     | highest_known_proportion*known_proportion_graphical_trend*(1-SUM(effect_on_unknown_proportion_by_vaccine_type_and_dose[*,*])) |             |
| known_to_unknown_shift_by_type_and_dose[PB, One]                     | 0                                                                                                                             | Days        |
| known_to_unknown_shift_by_type_and_dose[PB, Two]                     | 0                                                                                                                             | Dmnl        |
| known_to_unknown_shift_by_ty                                         | 0                                                                                                                             | Dmnl        |

|                                  |                                                                                                                                                                                                                                                                                                                                      |            |
|----------------------------------|--------------------------------------------------------------------------------------------------------------------------------------------------------------------------------------------------------------------------------------------------------------------------------------------------------------------------------------|------------|
| pe_and_dose[A<br>Z, One]         |                                                                                                                                                                                                                                                                                                                                      |            |
| known_to_unkn<br>own_shift_by_ty | 0                                                                                                                                                                                                                                                                                                                                    | Person/Day |
| pe_and_dose[A<br>Z, Two]         |                                                                                                                                                                                                                                                                                                                                      |            |
| lockdown_delay                   | 7                                                                                                                                                                                                                                                                                                                                    | Dmnl       |
|                                  | IF Intervention_switch=0 OR<br>TIME<=Time_actuals_end THEN<br>lockdown_%_planned_and_histo<br>rical ELSE IF<br>HISTORY(smoothed_known_ne<br>w_cases, TIME-<br>lockdown_delay)<cases_to_invo<br>ke_intervention THEN<br>lockdown_%_planned_and_histo<br>rical ELSE MIN(83.6,<br>lockdown_%_planned_and_histo<br>rical+invervention_%) |            |
| lockdown%_mo<br>dified           |                                                                                                                                                                                                                                                                                                                                      | Days       |
| max_immune_fr<br>action          | 0.7                                                                                                                                                                                                                                                                                                                                  | Dmnl       |
| new_recorded_d<br>eaths          | DELAY(deaths, 3)                                                                                                                                                                                                                                                                                                                     |            |
|                                  | controlled_infecting_contact_rate[<br>unknown]*total_fraction_suscepti<br>ble* (disease_duration_stage_1<br>+unknown_disease_duration_sta<br>ge_2)                                                                                                                                                                                   |            |
| Rt[unknown]                      |                                                                                                                                                                                                                                                                                                                                      | Dmnl       |
|                                  | controlled_infecting_contact_rate[<br>known]*total_fraction_susceptibl<br>e*<br>known_disease_duration_stage_2<br>Rt[known]*known_proportion+Rt<br>[unknown]*(1-<br>known_proportion)                                                                                                                                                |            |
| Rt[known]                        |                                                                                                                                                                                                                                                                                                                                      | Days       |
| Rt_composite                     |                                                                                                                                                                                                                                                                                                                                      | Person/Day |
| second_dose_off<br>set           | 84                                                                                                                                                                                                                                                                                                                                   | Person/Day |
| smoothed_know<br>n_new_cases     | SMTH1(known_new_cases, 7)                                                                                                                                                                                                                                                                                                            | Days       |
| smoothed_new<br>deaths           | SMTH1(new_recorded_deaths, 7)                                                                                                                                                                                                                                                                                                        | Days       |
| Time_actuals_en<br>d             | 449                                                                                                                                                                                                                                                                                                                                  | Dmnl       |
| time_from_kno<br>wn_till_death   | 11.0171561262915                                                                                                                                                                                                                                                                                                                     | Person     |
| total_fraction_su<br>sceptible   | fraction_recovered_susceptible+fr<br>action_new_susceptible                                                                                                                                                                                                                                                                          | Person/Day |



|                                                  |                                                                                                                                                                                                         |             |                      |
|--------------------------------------------------|---------------------------------------------------------------------------------------------------------------------------------------------------------------------------------------------------------|-------------|----------------------|
| total_indicated_immune_population                | SUM(indicated_immune_population_by_dose[,*])                                                                                                                                                            | Person      |                      |
| total_new_cases                                  | known_new_cases+unknown_evolving_into_stage_2<br>incubating +<br>recovered_susceptible +<br>recovered_unknown_immune +                                                                                  | Person      |                      |
| total_pop                                        | recovered_known_immune +<br>unknown_infected_stage_1 +<br>new_susceptible_unadjusted +<br>known_infected_stage_2 +<br>unknown_infected_stage_2<br>new_susceptible_unadjusted +<br>recovered_susceptible | Dose        | SUMMING<br>CONVERTER |
| total_susceptible                                |                                                                                                                                                                                                         | 1/Day       | SUMMING<br>CONVERTER |
| total_vaccinations                               | SUM(vaccinations_by_type_and_dose[,*])                                                                                                                                                                  |             |                      |
| unconstrained_infecting_contact_rate[unknown]    | 0.561566726696367                                                                                                                                                                                       | Day         |                      |
| unconstrained_infecting_contact_rate[known]      | 0.141751735131141                                                                                                                                                                                       | Dmnl        |                      |
| unknown_disease_duration_stage_2                 | 5                                                                                                                                                                                                       | Dose/Days   |                      |
| unknown_infectiousness_ratio                     | 0.722918698809817                                                                                                                                                                                       |             |                      |
| vaccination_daily_rate[PB]                       | 130000                                                                                                                                                                                                  | Days        |                      |
| vaccination_daily_rate[AZ]                       | 380000                                                                                                                                                                                                  |             |                      |
| vaccination_start_date[PB, One]                  | 324+21                                                                                                                                                                                                  |             |                      |
| vaccination_start_date[PB, Two]                  | 324+7+second_dose_offset                                                                                                                                                                                |             |                      |
| vaccination_start_date[AZ, One]                  | 339+21                                                                                                                                                                                                  | Dmnl        |                      |
| vaccination_start_date[AZ, Two]                  | 339+7+second_dose_offset                                                                                                                                                                                | Person/Dose |                      |
| vaccine_immune_fraction                          | MIN(max_immune_fraction,<br>total_indicated_immune_population/total_pop)                                                                                                                                |             |                      |
| vaccine_transmission_protection_by_dose[PB, One] | 0.65                                                                                                                                                                                                    |             |                      |
| vaccine_transmission_protection_by_dose[PB, Two] | 0.05                                                                                                                                                                                                    |             |                      |

---

|                                                         |      |
|---------------------------------------------------------|------|
| vaccine_transmission_protection<br>_by_dose[AZ,<br>One] | 0.65 |
| vaccine_transmission_protection<br>_by_dose[AZ,<br>Two] | 0.05 |

---
